# Supplementary material for: Autophagy protein LC3 regulates the fibrosis of hypertrophic scar by controlling Bcl-xL in dermal fibroblasts
Source: PubMed Central journal article supplement (PMC5706833; doi:10.18632/oncotarget.20771), 2017-09-08
Supplement: oncotarget-08-93757-s001.pdf [file oncotarget-08-93757-s001.pdf]

## Autophagy protein LC3 regulates the fibrosis of hypertrophic scar by controlling Bcl-xL in dermal fibroblasts

### SUPPLEMENTARY MATERIALS

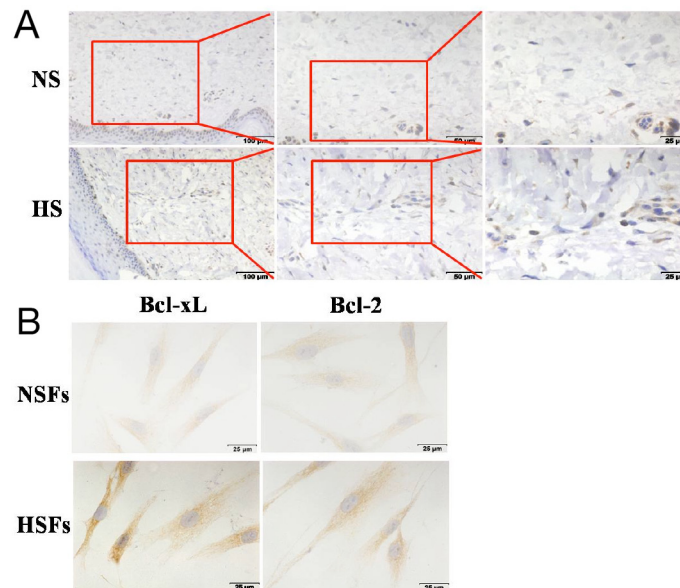

**Supplementary Figure 1: Immunostaining analysis of Bcl-xL in HS/HSFs and NS/NSFs.** (A) Tissues were fixed and prepared samples by immunostaining for observation. Bcl-xL-positive cells in HS were more intensive relative to those in NS. Scale bars, 100 μm, 50 μm and 25 μm. (B) NSFs and HSFs were grown on coverslips until they reached 70-80% confluence, fixed in 10% formaldehyde, washed, permeabilized, and blocked. Cells were incubated with a Bcl-xL monoclonal antibody, followed by incubation with a corresponding Streptavidin-peroxidase DAB staining showed that Bcl-xL was localized in HSFs and NSFs. Bcl-xL was distributed in the cytoplasm, with more intensive staining in HSFs than in NSFs. Scale bars, 25 μm.

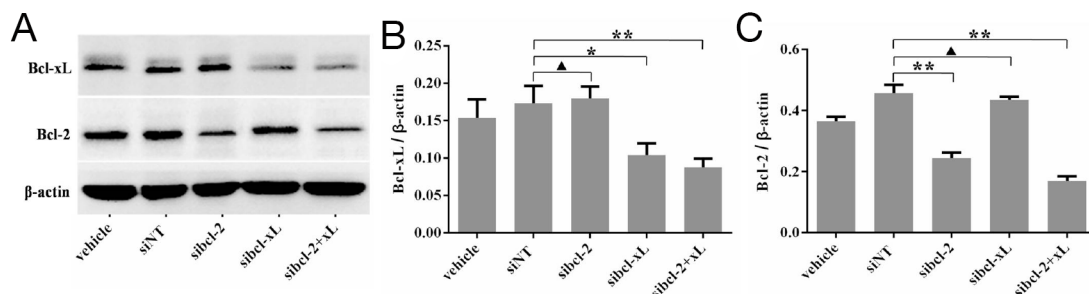

**Supplementary Figure 2: The effects of sibcl-xL and sibcl-2 on their protein levels in HSFs.** HSFs, with 70-80% confluent, were transfected by siRNAs and their negative control, cultured in DMEM medium for 48 h. (A) The expression levels of Bcl-xL and Bcl-2 in silencing for Bcl-xL and Bcl-2 by Western blot analyses. (B) Bcl-xL protein expresses and changes in the Bcl-xL/β-actin ratio. (C) Bcl-2 protein expresses and changes in the Bcl-2/β-actin ratio. Data are representative of three experiments. n = 3, ▲p > 0.05, \*p < 0.05, \*\*p < 0.01 compared with the negative control group.
